# Supplementary material for: Whole-Genome Sequences of Five Acinetobacter baumannii Strains From a Child With Leukemia M2
Source: Front Microbiol. 2019 Feb 6;10:132. doi: 10.3389/fmicb.2019.00132 (PMC6372515; doi:10.3389/fmicb.2019.00132)
Supplement: Supplementary file 1 [file Table_1.XLSX]

## Sheet: Hoja1
Supplementary Table1. Sequence statistics
Strain	Coverage	Contigs	N50	Average Contig Length	Total Length
810CP	464x	3	4089681	1370352	4111057
433H	228x	113	113417	35512	4012875
434H	214x	119	123732	33725	4013342
483H	348x	242	39920	16498	3992529
A2	140x	138	59323	29075	4012364
